# Supplementary material for: Self-assembled three-dimensional graphene-based materials for dye adsorption and catalysis
Source: Royal Society of Chemistry journal article supplement (doi:10.1039/c5ta00355e), 2015-01-01
Supplement: c5ta00355e1.pdf [file c5ta00355e1.pdf]

## Supplementary Information

### **Self-assembled three-dimensional graphene-based materials for dye adsorption and catalysis**

Xueping Zhang,<sup>a, b</sup> Dong Liu,<sup>a</sup> Lu Yang,<sup>a</sup> Limin, Zhou,<sup>a, b</sup> and Tianyan You<sup>\*a</sup>

<sup>a</sup>State Key Laboratory of Electroanalytical Chemistry, Changchun Institute of Applied Chemistry,

Chinese Academy of Sciences, Changchun 130022, China

<sup>b</sup>University of Chinese Academy of Sciences, Beijing 100049, China

<sup>\*a</sup>Corresponding author.

Email: [youty@ciac.jl.cn](mailto:youty@ciac.jl.cn) (T. Y. You), Tel: +86-431-85262850

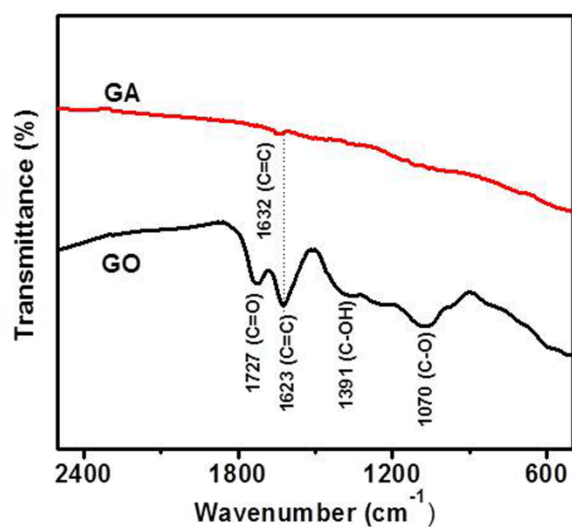

**Fig. S1** FT-IR spectra of GO and GA samples.

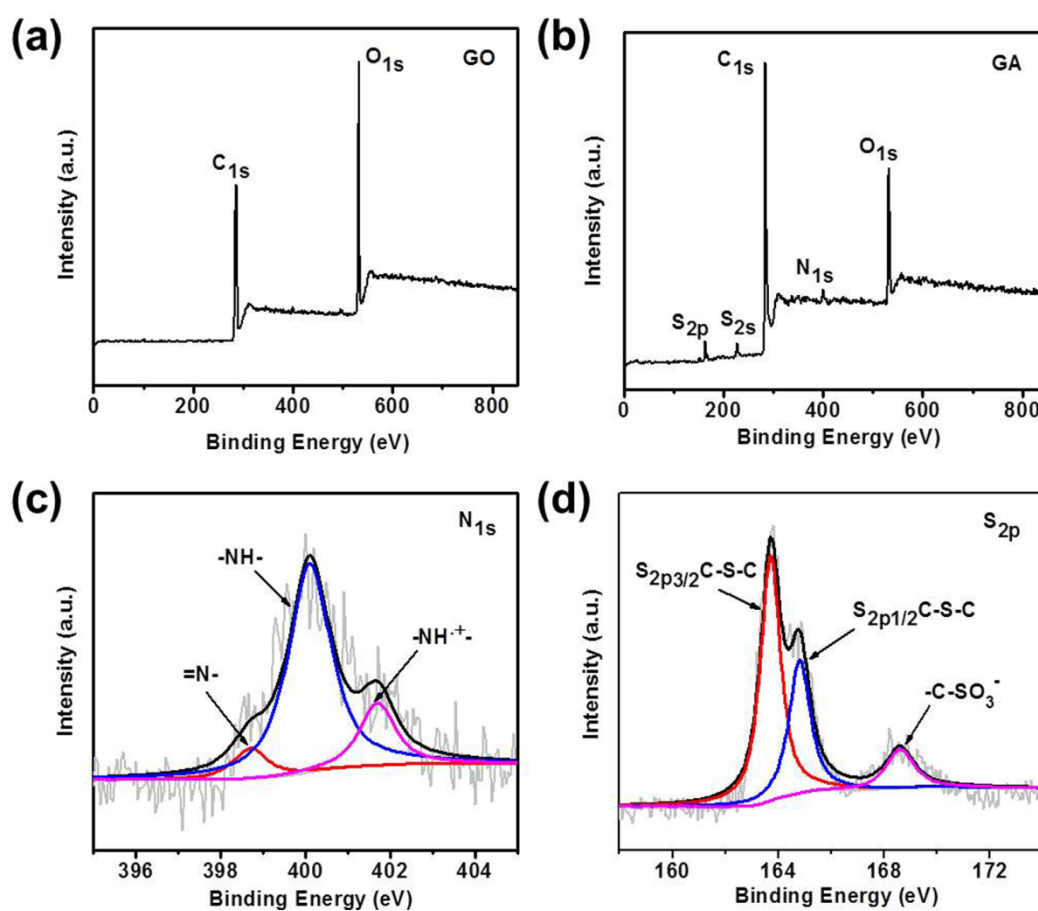

**Fig. S2** XPS survey spectra of GO (a) and GA (b). XPS  $N_{1s}$  (c) and  $S_{2p}$  (d) spectra of GA.

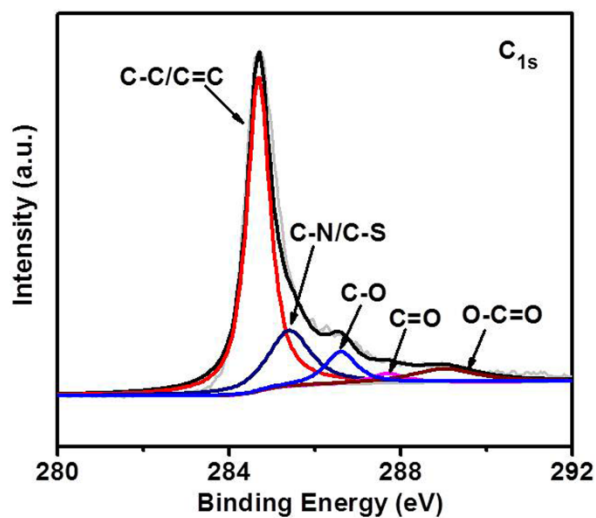

**Fig. S3** XPS  $C_{1s}$  spectra of PtNPs/GA.

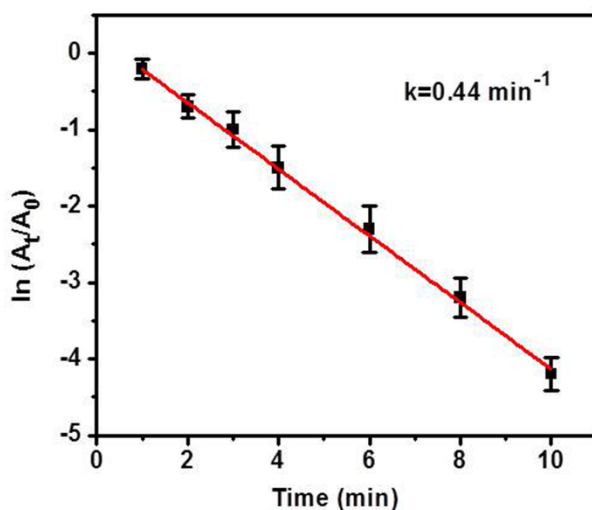

**Fig. S4** Kinetic curve for the reduction of 4-nitroaniline by  $\text{NaBH}_4$  in the presence of PtNPs/GA ( $A_t$  and  $A_0$  are the absorbance of 4-nitroaniline solution at time  $t$  and 0, respectively).

## References

- 1 H. S. Oh, K. Kim and H. Kim, *Int. J. Hydrogen Energy*, 2011, **36**, 11564.
- 2 Y. Q. Dong, H. C. Pang, H. B. Yang, C. X. Guo, J. W. Shao, Y. W. Chi, C. M. Li and T. Yu, *Angew. Chem. Int. Ed.*, 2013, **52**, 7800.
- 3 H. Huang, Y. C. Lu, A. J. Wang, J. H. Liu, J. R. Chen and J. J. Feng, *RSC Adv.*, 2014, **4**, 11872.
